# Supplementary material for: Eritoran Attenuates Hepatic Inflammation and Fibrosis in Mice with Chronic Liver Injury
Source: MDPI journal article supplement (doi:10.3390/cells10061562), 2021-06-21
Supplement: s1 [file s1]

**Table S1.** Primers used for quantitative RT-PCR.

| Gene name | Primer  | Sequence                           | Size (bp) |
|-----------|---------|------------------------------------|-----------|
| Mouse     |         |                                    |           |
| Mcp1      | Forward | 5'- ACCACAGTCCATGCCATCAC-3'        | 986       |
|           | Reverse | 5'- TTGAGGTGGTTGTGGAAAAG-3'        |           |
| Tgfb1     | Forward | 5'- GTGGAAATCAACGGGATCAG-3'        | 229       |
|           | Reverse | 5'- ACTTCCAACCCAGGTCCTTC-3'        |           |
| Mmp2      | Forward | 5'- CTGATAACCTGGATGCCGTCGT-3'      | 117       |
|           | Reverse | 5'- TGCTTCCAAACTTCACGCTCTT-3'      |           |
| Acta2     | Forward | 5'- GTCCCAGACATCAGGGAGTAA-3'       | 102       |
|           | Reverse | 5'- TCGGATACTTCAGCGTCAGGA-3'       |           |
| Col1a1    | Forward | 5'- GAGCGGAGAGTACTGGATCG-3'        | 158       |
|           | Reverse | 5'- GCTTCTTTTCCTTGGGGTTC-3'        |           |
| Timp1     | Forward | 5'- CCAGAACCGCAGTGAAGAG-3'         | 183       |
|           | Reverse | 5'- CAA GGG ATA GAT AAA CAG GGA-3' |           |
| Tnfa      | Forward | 5'- TGCCTATGTCTCAGCCTCTTC-3'       | 117       |
|           | Reverse | 5'- GAGGCCATTTGGGAACCTTCT-3'       |           |
| Gapdh     | Forward | 5'- TGTTGAAGTCGCAGGAGACAACCT-3'    | 111       |
|           | Reverse | 5'- AACCTGCCAAGTATGATGACATCA-3'    |           |

**Table S2.** Antibody details and conditions used for western blotting and immunostaining

| Antibody            | Supplier       | Catalog no. | Application | Dilution |
|---------------------|----------------|-------------|-------------|----------|
| $\beta$ -actin      | GeneTex        | GTX629630   | WB          | 1:10000  |
| Lamin B1            | Cell Signaling | #12586      | WB          | 1:1000   |
| $\alpha$ -SMA       | GeneTex        | GTX100034   | WB          | 1:1000   |
|                     |                |             | IHC         | 1:700    |
| p-ERK1/2            | Cell Signaling | #9101       | WB          | 1:1000   |
| t-ERK1/2            | Cell Signaling | #9102       | WB          | 1:1000   |
| p-p38               | Cell Signaling | #9216       | WB          | 1:1000   |
| t-p38               | Cell Signaling | #9212       | WB          | 1:1000   |
| p-JNK               | Cell Signaling | #4668       | WB          | 1:1000   |
| t-JNK               | Cell Signaling | #9252       | WB          | 1:1000   |
| TLR4                | GeneTex        | GTX13556    | WB          | 1:1000   |
| MyD88               | GeneTex        | GTX112987   | WB          | 1:5000   |
| NF- $\kappa$ B p65  | GeneTex        | GTX102090   | WB          | 1:1500   |
|                     |                |             | IF          | 1:200    |
| NF- $\kappa$ B pp65 | Cell Signaling | #3033       | FCM         | 1:1600   |
| TGF- $\beta$ 1      | Abcam          | ab92486     | WB          | 1:1000   |
| F4/80               | Abcam          | ab6640      | IHC         | 1:400    |
| MPO                 | Abcam          | ab9535      | IHC         | 1:50     |

Antibodies were purchased from Cell Signaling (Beverly, MA, USA), Abcam (Cambridge, MA, USA), GeneTex (Irvine, CA, USA). WB: western blotting; IHC: immunohistochemistry; IF: immunofluorescence; FCM: flow cytometry
